# Supplementary material
Source: PubMed Central journal article supplement (PMC2980409)
Supplement: 00394.2010_1.pdf [file 00394.2010_1.pdf]

**Supplemental Data:**

**Movie S1: 3D view of a developing nephron at stage IV:** *wt1b::GFP* (green) is expressed throughout the glomerulus and the tubular epithelial cells although *pod::mCherry* expression is evident in the glomerular podocytes.

**Movie S2: 3D view of a nephron near its complete maturation:** *wt1b::GFP* expression is disappearing in the tubular epithelial cells, but retained at the urinary pole of the glomerulus.
